# Supplementary material for: Beyond Homozygosity Mapping: Family-Control analysis based on Hamming distance for prioritizing variants in exome sequencing
Source: PubMed Central journal article supplement (PMC5155624; doi:10.1038/srep12028), 2015-07-06
Supplement: srep12028-s1.pdf [file srep12028-s1.pdf]

# Beyond Homozygosity Mapping: Family-Control analysis based on Hamming distance for prioritizing variants in exome sequencing

Atsuko Imai, Akihiro Nakaya, Somayyeh Fahiminiya, Martine Tétréault, Jacek Majewski, Yasushi Sakata, Seiji Takashima, Mark Lathrop, Jurg Ott

## Supplementary Information

For each of the six individuals with known pathogenic variants (see Table 1 of main text), Table S1 below shows all shortlisted candidate variants used in our HDR calculations. The headings have the following meaning:

Group 1, group 2: Mean HDR values for the two types of pairs of individuals (group 1 = affected-control, group 2 = control-control)

n1, n2: Numbers of pairs in groups 1 and 2, respectively

Teststat: Statistic ( $t_{\max}$ ) for ranking candidate variants

R: Distance (100 kb through 1000 kb in steps of 100 kb) from candidate variant at which maximum  $t$  statistic was obtained

p: Empirical significance level associated with  $t_{\max}$  statistic

chr, position: Chromosomal position of candidate variant

## Table S1

List of all shortlisted candidate variants in each of the six patients used in our HDR calculations

### Family F1

| Group 1 | Group 2 | n1 | n2  | Teststat | R   | p      | chr | position  |
|---------|---------|----|-----|----------|-----|--------|-----|-----------|
| 0.9461  | 0.7446  | 30 | 435 | 21.4280  | 400 | 0.0645 | 2   | 47221651  |
| 0.9325  | 0.7117  | 30 | 435 | 13.4096  | 400 | 0.0645 | 2   | 96780987  |
| 0.6404  | 0.5448  | 30 | 435 | 4.0005   | 300 | 0.3871 | 3   | 63898266  |
| 0.6317  | 0.4648  | 30 | 435 | 7.0371   | 100 | 0.0323 | 4   | 145041707 |
| 0.6317  | 0.4648  | 30 | 435 | 7.0371   | 100 | 0.0323 | 4   | 145041707 |
| 0.8197  | 0.8206  | 30 | 435 | -0.0454  | 700 | 0.9032 | 7   | 1477775   |
| 0.6766  | 0.7302  | 30 | 435 | -1.0182  | 400 | 0.6774 | 7   | 19184751  |
| 0.7066  | 0.7197  | 30 | 435 | -0.5223  | 600 | 0.6774 | 7   | 100639356 |
| 0.8207  | 0.8073  | 30 | 435 | 0.4140   | 400 | 0.6129 | 10  | 17891606  |
| 0.8940  | 0.6773  | 30 | 435 | 6.1923   | 100 | 0.2581 | 14  | 24646407  |

## Family F4

| Group 1 | Group 2 | n1 | n2  | Teststat | R   | p      | chr | position  |
|---------|---------|----|-----|----------|-----|--------|-----|-----------|
| 0.6287  | 0.6591  | 30 | 435 | -2.2488  | 900 | 0.9677 | 1   | 3753032   |
| 0.9582  | 0.7446  | 30 | 435 | 23.8125  | 400 | 0.0645 | 2   | 47221651  |
| 0.7182  | 0.6528  | 30 | 435 | 1.7252   | 300 | 0.5484 | 2   | 113145900 |
| 0.9306  | 0.5809  | 30 | 435 | 10.6393  | 300 | 0.1290 | 4   | 110384050 |
| 0.7493  | 0.7276  | 30 | 435 | 1.2184   | 400 | 0.6774 | 5   | 64070616  |
| 0.8837  | 0.7848  | 30 | 435 | 5.1549   | 600 | 0.3226 | 9   | 123787697 |
| 0.8357  | 0.8397  | 30 | 435 | -0.1571  | 600 | 0.8065 | 10  | 18439797  |
| 0.5274  | 0.5270  | 30 | 435 | 0.0155   | 100 | 0.7419 | 11  | 64112394  |
| 0.5921  | 0.6157  | 30 | 435 | -0.7640  | 100 | 0.8065 | 13  | 42733389  |
| 0.8817  | 0.6773  | 30 | 435 | 7.6355   | 100 | 0.1613 | 14  | 24646408  |
| 0.8862  | 0.7873  | 30 | 435 | 4.6546   | 100 | 0.2581 | 18  | 7023207   |
| 0.6718  | 0.7360  | 30 | 435 | -2.0901  | 300 | 0.8710 | 20  | 271204    |
| 0.8620  | 0.6569  | 30 | 435 | 6.6706   | 400 | 0.3871 | 21  | 34003927  |
| 0.7967  | 0.7301  | 30 | 435 | 2.4446   | 200 | 0.3226 | 23  | 47307172  |

## Family F6

| Group 1 | Group 2 | n1 | n2  | Teststat | R    | p      | chr | position  |
|---------|---------|----|-----|----------|------|--------|-----|-----------|
| 0.8324  | 0.7275  | 30 | 435 | 5.7272   | 100  | 0.2581 | 1   | 242042364 |
| 0.8102  | 0.6619  | 30 | 435 | 12.9711  | 900  | 0.0645 | 1   | 248637367 |
| 0.8102  | 0.6619  | 30 | 435 | 12.9711  | 900  | 0.0645 | 1   | 248637367 |
| 0.9499  | 0.7446  | 30 | 435 | 22.5812  | 400  | 0.0645 | 2   | 47221651  |
| 0.9667  | 0.7400  | 30 | 435 | 6.1658   | 100  | 0.1935 | 4   | 140811063 |
| 0.5757  | 0.5493  | 30 | 435 | 1.2226   | 500  | 0.4839 | 8   | 145487205 |
| 0.6831  | 0.5809  | 30 | 435 | 3.3563   | 100  | 0.2903 | 9   | 140007244 |
| 0.6549  | 0.5913  | 30 | 435 | 1.2926   | 100  | 0.5161 | 13  | 77566213  |
| 0.6589  | 0.6496  | 30 | 435 | 0.4356   | 500  | 0.6452 | 15  | 41228471  |
| 0.8985  | 0.8291  | 30 | 435 | 2.4174   | 100  | 0.4516 | 17  | 44408458  |
| 0.7519  | 0.7993  | 30 | 435 | -1.8598  | 1000 | 0.8710 | 20  | 46279830  |
| 0.9418  | 0.8375  | 30 | 435 | 3.6471   | 300  | 0.4194 | 23  | 22291631  |
| 0.7779  | 0.7176  | 30 | 435 | 2.0803   | 300  | 0.4516 | 23  | 70472939  |
| 0.6687  | 0.4763  | 30 | 435 | 7.1048   | 600  | 0.1613 | 23  | 105190439 |
| 1.0000  | 0.7990  | 30 | 435 | 14.6270  | 700  | 0.0323 | 23  | 132092479 |
| 0.6344  | 0.6982  | 30 | 435 | -1.1260  | 300  | 0.6129 | 23  | 136648899 |
| 0.6447  | 0.6084  | 30 | 435 | 1.4293   | 400  | 0.4839 | 23  | 153033339 |
| 0.7106  | 0.5726  | 30 | 435 | 9.0898   | 900  | 0.2581 | 23  | 153581714 |

## Family L1, individual a

| Group 1 | Group 2 | n1 | n2  | Teststat | R   | p      | chr | position  |
|---------|---------|----|-----|----------|-----|--------|-----|-----------|
| 0.5844  | 0.6049  | 30 | 435 | -0.6582  | 100 | 0.8387 | 1   | 156844800 |
| 0.7808  | 0.7432  | 30 | 435 | 2.0716   | 700 | 0.3871 | 1   | 157504466 |
| 0.7417  | 0.6729  | 30 | 435 | 5.8050   | 500 | 0.0968 | 1   | 160187324 |
| 0.4584  | 0.5251  | 30 | 435 | -1.1984  | 100 | 0.6129 | 1   | 197026151 |
| 0.7355  | 0.6651  | 30 | 435 | 3.7270   | 100 | 0.3548 | 1   | 201186501 |
| 0.8756  | 0.7352  | 30 | 435 | 7.0622   | 100 | 0.1290 | 1   | 205211021 |
| 0.7084  | 0.6500  | 30 | 435 | 1.5057   | 200 | 0.5161 | 2   | 26403750  |
| 0.8155  | 0.7103  | 30 | 435 | 3.0008   | 100 | 0.3548 | 2   | 44545234  |
| 0.8155  | 0.7103  | 30 | 435 | 3.0008   | 100 | 0.3548 | 2   | 44545234  |
| 0.5679  | 0.6141  | 30 | 435 | -1.1661  | 400 | 0.5484 | 2   | 86304932  |
| 0.7985  | 0.7307  | 30 | 435 | 1.6027   | 100 | 0.5484 | 2   | 191231418 |
| 0.7963  | 0.7872  | 30 | 435 | 0.6956   | 400 | 0.6774 | 3   | 186575720 |
| 0.8812  | 0.7902  | 30 | 435 | 6.9479   | 200 | 0.1290 | 3   | 195295708 |
| 0.7877  | 0.7386  | 30 | 435 | 2.8254   | 400 | 0.3871 | 3   | 195514904 |

|        |        |    |     |         |      |        |    |           |
|--------|--------|----|-----|---------|------|--------|----|-----------|
| 0.7697 | 0.7226 | 30 | 435 | 3.3279  | 500  | 0.5484 | 5  | 79435419  |
| 0.5098 | 0.4927 | 30 | 435 | 1.5193  | 600  | 0.5484 | 5  | 176981495 |
| 0.8594 | 0.8352 | 30 | 435 | 1.2375  | 700  | 0.5484 | 6  | 1390137   |
| 0.8969 | 0.8481 | 30 | 435 | 4.5034  | 800  | 0.3548 | 6  | 4079250   |
| 0.7506 | 0.7560 | 30 | 435 | -0.1811 | 100  | 0.5806 | 6  | 148865088 |
| 0.7895 | 0.5742 | 30 | 435 | 14.5781 | 400  | 0.0323 | 6  | 157099185 |
| 0.6098 | 0.5041 | 30 | 435 | 5.5257  | 100  | 0.1290 | 8  | 24211992  |
| 0.7435 | 0.8459 | 30 | 435 | -1.9055 | 300  | 0.8710 | 8  | 105601198 |
| 0.8149 | 0.7680 | 30 | 435 | 4.3772  | 1000 | 0.4194 | 9  | 36216324  |
| 0.7606 | 0.7172 | 30 | 435 | 4.6728  | 1000 | 0.3548 | 9  | 138899381 |
| 0.7191 | 0.7896 | 30 | 435 | -2.2728 | 300  | 0.9677 | 9  | 141107551 |
| 0.5885 | 0.5799 | 30 | 435 | 0.2888  | 300  | 0.3871 | 11 | 100863593 |
| 0.6671 | 0.6075 | 30 | 435 | 2.7809  | 200  | 0.5806 | 12 | 3919812   |
| 1.0000 | 0.7481 | 30 | 435 | 14.8125 | 200  | 0.0645 | 12 | 106826199 |
| 0.9088 | 0.8071 | 30 | 435 | 2.5292  | 100  | 0.4516 | 12 | 108168740 |
| 0.9054 | 0.8272 | 30 | 435 | 5.7386  | 500  | 0.2903 | 12 | 110290224 |
| 0.9000 | 0.7310 | 30 | 435 | 10.3874 | 700  | 0.0968 | 12 | 110969768 |
| 0.6298 | 0.6157 | 30 | 435 | 0.2967  | 100  | 0.5484 | 13 | 20247226  |
| 0.7019 | 0.7509 | 30 | 435 | -1.2408 | 200  | 0.9032 | 13 | 50275349  |
| 0.7167 | 0.7091 | 30 | 435 | 0.2786  | 200  | 0.5484 | 14 | 77737364  |
| 0.8442 | 0.7578 | 30 | 435 | 6.8167  | 800  | 0.2258 | 14 | 91699763  |
| 0.9022 | 0.8827 | 30 | 435 | 1.8237  | 800  | 0.5484 | 14 | 95566108  |
| 0.7417 | 0.6729 | 30 | 435 | 4.6065  | 600  | 0.2903 | 14 | 104647113 |
| 0.6904 | 0.6489 | 30 | 435 | 3.5799  | 800  | 0.4194 | 17 | 7750177   |
| 0.4094 | 0.2732 | 30 | 435 | 5.7728  | 100  | 0.4194 | 17 | 38296601  |
| 0.7911 | 0.7360 | 30 | 435 | 4.6277  | 1000 | 0.3871 | 19 | 1941176   |
| 0.9349 | 0.6459 | 30 | 435 | 8.9682  | 100  | 0.1935 | 19 | 12810274  |
| 0.9349 | 0.6459 | 30 | 435 | 8.9682  | 100  | 0.1935 | 19 | 12810274  |
| 0.6614 | 0.6394 | 30 | 435 | 0.6876  | 100  | 0.6452 | 20 | 43343899  |
| 1.0000 | 0.8190 | 30 | 435 | 11.7647 | 100  | 0.0645 | 22 | 39131509  |
| 0.8265 | 0.7878 | 30 | 435 | 1.0687  | 400  | 0.3226 | 23 | 11160419  |
| 1.0000 | 0.8448 | 30 | 435 | 10.4183 | 100  | 0.0968 | 23 | 38156584  |
| 0.7174 | 0.6901 | 30 | 435 | 0.7256  | 500  | 0.7419 | 23 | 70389354  |
| 0.7375 | 0.7539 | 30 | 435 | -0.4694 | 800  | 0.5806 | 23 | 127186133 |
| 0.6376 | 0.6034 | 30 | 435 | 2.3868  | 500  | 0.5161 | 23 | 151092264 |
| 0.8511 | 0.6460 | 30 | 435 | 11.2674 | 200  | 0.2258 | 23 | 153762615 |

### Family L1, individual *b*

| Group 1 | Group 2 | n1 | n2  | Teststat | R    | p      | chr | position  |
|---------|---------|----|-----|----------|------|--------|-----|-----------|
| 0.7465  | 0.7080  | 30 | 435 | 3.1738   | 900  | 0.3548 | 1   | 20971158  |
| 0.6045  | 0.4531  | 30 | 435 | 8.9011   | 100  | 0.1613 | 1   | 22165560  |
| 0.7811  | 0.7341  | 30 | 435 | 2.0665   | 500  | 0.4194 | 1   | 28261738  |
| 0.6588  | 0.4796  | 30 | 435 | 6.0033   | 100  | 0.1935 | 1   | 29063346  |
| 0.9394  | 0.4611  | 30 | 435 | 14.3510  | 100  | 0.0323 | 1   | 43849952  |
| 0.7932  | 0.6118  | 30 | 435 | 8.7779   | 100  | 0.1613 | 1   | 44360114  |
| 0.7391  | 0.7453  | 30 | 435 | -0.2797  | 800  | 0.5806 | 1   | 157504466 |
| 0.7686  | 0.7245  | 30 | 435 | 1.2553   | 100  | 0.5806 | 1   | 242052841 |
| 0.5909  | 0.5581  | 30 | 435 | 1.9022   | 1000 | 0.5161 | 1   | 248201550 |
| 0.8042  | 0.7248  | 30 | 435 | 2.0547   | 200  | 0.4194 | 2   | 44545234  |
| 0.7871  | 0.7289  | 30 | 435 | 4.1082   | 1000 | 0.2258 | 2   | 191231418 |
| 0.9026  | 0.8690  | 30 | 435 | 1.4587   | 200  | 0.5161 | 2   | 242707650 |
| 0.8062  | 0.7433  | 30 | 435 | 1.0250   | 100  | 0.3548 | 5   | 140230792 |
| 0.7273  | 0.7135  | 30 | 435 | 0.7056   | 1000 | 0.7097 | 7   | 100271438 |
| 0.9841  | 0.6408  | 30 | 435 | 14.0453  | 300  | 0.1935 | 8   | 53045842  |
| 0.6862  | 0.6628  | 30 | 435 | 0.4285   | 200  | 0.6129 | 8   | 86126829  |
| 0.8380  | 0.8000  | 30 | 435 | 3.6996   | 800  | 0.2581 | 9   | 139235823 |
| 0.9550  | 0.8900  | 30 | 435 | 3.3489   | 100  | 0.7419 | 10  | 80828849  |

|        |        |    |     |         |      |        |    |           |
|--------|--------|----|-----|---------|------|--------|----|-----------|
| 0.7472 | 0.6154 | 30 | 435 | 7.7405  | 700  | 0.1935 | 10 | 93389538  |
| 0.7516 | 0.7317 | 30 | 435 | 1.3233  | 800  | 0.5161 | 10 | 95462279  |
| 1.0000 | 0.7481 | 30 | 435 | 14.8125 | 200  | 0.0645 | 12 | 106826199 |
| 0.9258 | 0.7310 | 30 | 435 | 13.3464 | 700  | 0.0968 | 12 | 110969768 |
| 0.6093 | 0.6034 | 30 | 435 | 0.1272  | 200  | 0.5484 | 13 | 20247226  |
| 0.5888 | 0.5521 | 30 | 435 | 3.3216  | 900  | 0.3226 | 14 | 23345962  |
| 0.6882 | 0.3392 | 30 | 435 | 16.6739 | 100  | 0.1613 | 16 | 27801147  |
| 0.5451 | 0.4976 | 30 | 435 | 2.7014  | 400  | 0.3871 | 16 | 31004013  |
| 0.7658 | 0.6849 | 30 | 435 | 3.6819  | 700  | 0.5484 | 17 | 55197982  |
| 0.8468 | 0.8082 | 30 | 435 | 2.6532  | 600  | 0.5161 | 17 | 76109096  |
| 1.0000 | 0.6745 | 30 | 435 | 17.2313 | 100  | 0.0323 | 18 | 13029951  |
| 0.6854 | 0.6615 | 30 | 435 | 1.8106  | 1000 | 0.5806 | 18 | 21723319  |
| 0.7618 | 0.6917 | 30 | 435 | 3.2976  | 200  | 0.2903 | 18 | 22056759  |
| 0.5727 | 0.5304 | 30 | 435 | 1.2906  | 300  | 0.7419 | 18 | 49866783  |
| 0.7397 | 0.7650 | 30 | 435 | -0.8193 | 200  | 0.7419 | 19 | 17397501  |
| 0.8229 | 0.7969 | 30 | 435 | 0.6619  | 100  | 0.7419 | 20 | 10579398  |
| 0.7653 | 0.7673 | 30 | 435 | -0.0605 | 200  | 0.7742 | 20 | 33814576  |
| 0.8340 | 0.8721 | 30 | 435 | -1.2517 | 400  | 0.9355 | 20 | 34817990  |
| 0.9211 | 0.8097 | 30 | 435 | 7.1906  | 500  | 0.1935 | 20 | 43535225  |
| 0.8557 | 0.7473 | 30 | 435 | 7.9896  | 200  | 0.2581 | 20 | 48121370  |
| 0.8793 | 0.6826 | 30 | 435 | 11.7602 | 100  | 0.1290 | 21 | 45648099  |
| 0.7843 | 0.7830 | 30 | 435 | 0.0487  | 100  | 0.6129 | 21 | 46924440  |
| 0.7235 | 0.5810 | 30 | 435 | 4.4987  | 200  | 0.1935 | 22 | 41076970  |
| 0.9075 | 0.7056 | 30 | 435 | 16.4994 | 800  | 0.2581 | 22 | 41971076  |
| 0.9141 | 0.8520 | 30 | 435 | 5.6386  | 1000 | 0.3548 | 22 | 42950004  |
| 0.8398 | 0.7951 | 30 | 435 | 2.4476  | 100  | 0.4516 | 22 | 43525570  |

## Family OI

| Group 1 | Group 2 | n1 | n2  | Teststat | R    | p      | chr | position  |
|---------|---------|----|-----|----------|------|--------|-----|-----------|
| 0.5661  | 0.5863  | 32 | 496 | -0.4298  | 100  | 0.9091 | 1   | 25648421  |
| 0.9175  | 0.8595  | 32 | 496 | 3.5327   | 400  | 0.4848 | 5   | 796277    |
| 0.7918  | 0.7481  | 32 | 496 | 1.4799   | 1000 | 0.4848 | 5   | 140309125 |
| 0.7816  | 0.6131  | 32 | 496 | 4.6320   | 100  | 0.1818 | 6   | 18222560  |
| 0.8187  | 0.7894  | 32 | 496 | 1.4628   | 900  | 0.5152 | 7   | 37960285  |
| 0.8972  | 0.6440  | 32 | 496 | 23.1354  | 100  | 0.0303 | 8   | 22058957  |
| 0.8665  | 0.7697  | 32 | 496 | 9.2965   | 800  | 0.1818 | 8   | 22424180  |
| 0.6844  | 0.6048  | 32 | 496 | 6.2798   | 1000 | 0.2727 | 10  | 121410904 |
| 0.7380  | 0.6719  | 32 | 496 | 4.1562   | 600  | 0.3939 | 11  | 44286142  |
| 0.5837  | 0.5597  | 32 | 496 | 1.7622   | 1000 | 0.7273 | 12  | 7342367   |
| 0.5837  | 0.5597  | 32 | 496 | 1.7622   | 1000 | 0.7273 | 12  | 7342367   |
| 0.7176  | 0.6728  | 32 | 496 | 2.6734   | 800  | 0.6667 | 12  | 8693431   |
| 0.5631  | 0.6480  | 32 | 496 | -2.0950  | 100  | 0.9091 | 15  | 89400023  |
| 0.9008  | 0.6055  | 32 | 496 | 21.2759  | 500  | 0.0303 | 16  | 23478708  |
